# Supplementary material for: In situsurface-enhanced Raman spectroelectrochemistry reveals the molecular conformation of electrolyte additives in Li-ion batteries
Source: Royal Society of Chemistry journal article supplement (doi:10.1039/d1ta04218a), 2021-01-01
Supplement: d1ta04218a1.pdf [file d1ta04218a1.pdf]

## Supplementary Information

### ***In situ* surface-enhanced Raman spectroelectrochemistry reveals the molecular conformation of electrolyte additives in Li-ion batteries**

Chenbo Zhu<sup>a</sup>, Chenghao Fan<sup>a,b</sup>, Emiliano Cortés<sup>\*b</sup> and Wei Xie<sup>\*a</sup>

<sup>a</sup>Key Lab of Advanced Energy Materials Chemistry (Ministry of Education), Renewable Energy Conversion and Storage Center, College of Chemistry, Nankai University, Weijin Rd. 94, Tianjin, 300071, China.

<sup>b</sup> Chair in Hybrid Nanosystems, Nanoinstitut Munich, Faculty of Physics, Ludwig-Maximilians-Universität München, 80539 München, Germany.

Corresponding authors: [Emiliano.Cortes@lmu.de](mailto:Emiliano.Cortes@lmu.de) (E.C.) and [wei.xie@nankai.edu.cn](mailto:wei.xie@nankai.edu.cn) (W.X.)

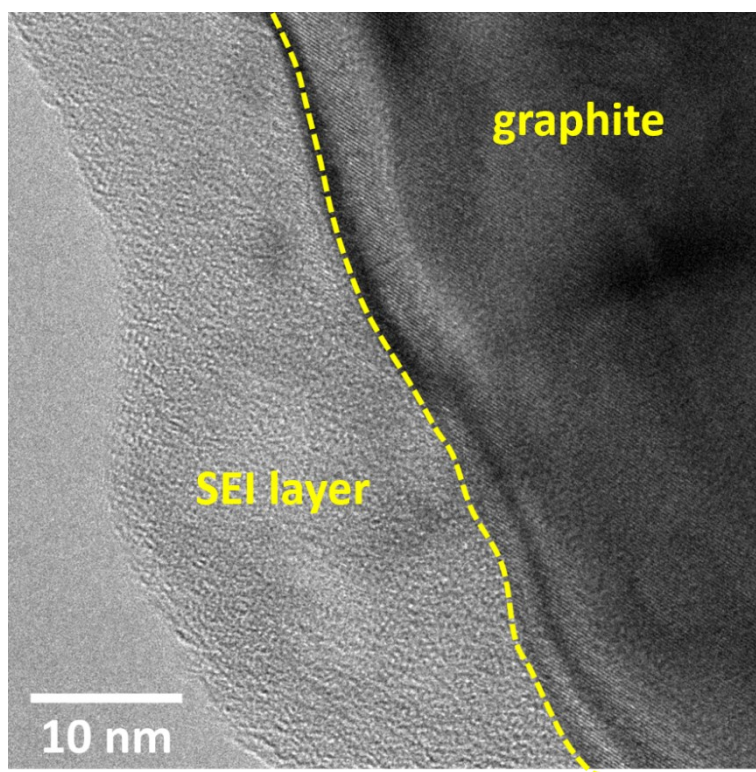

**Figure S1.** HRTEM image of graphite electrode without RhB after 3 cycles.

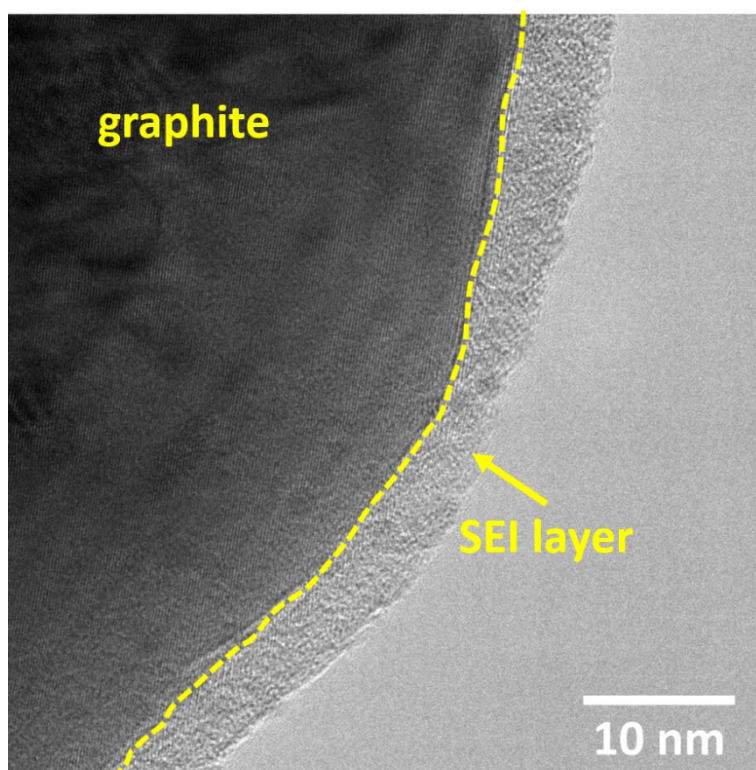

**Figure S2.** HRTEM image of graphite electrode with 0.2 wt% RhB after 3 cycles.

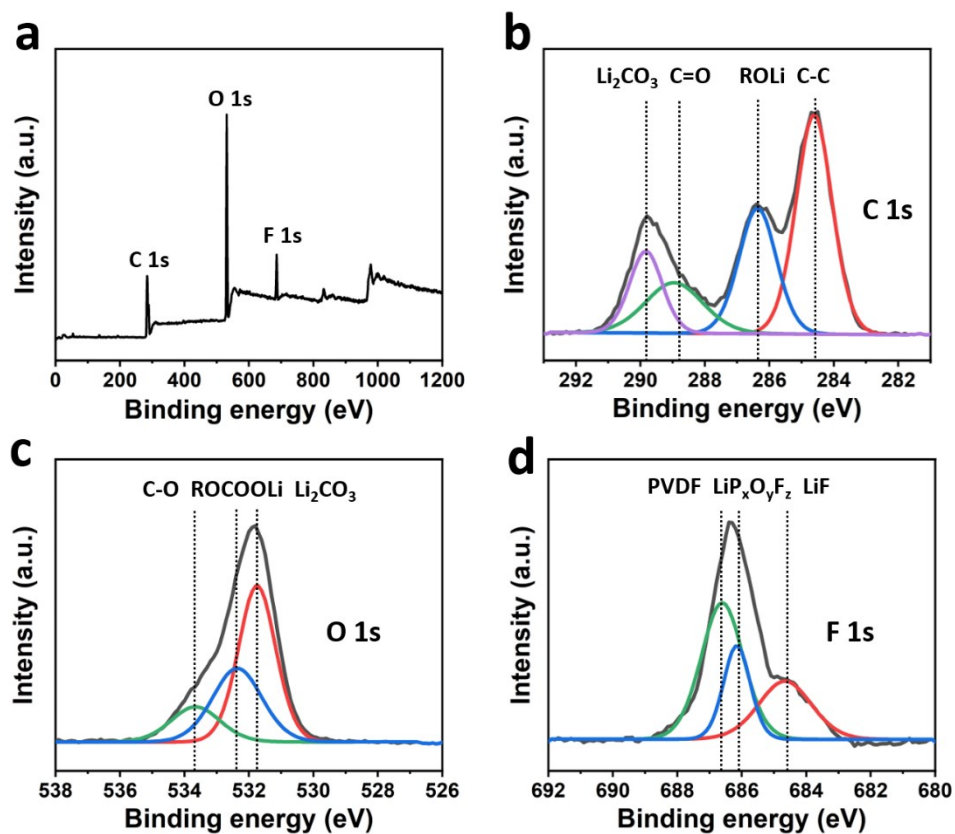

**Figure S3.** XPS spectra of the graphite electrode after 10 cycles in the electrolyte (1 M  $\text{LiPF}_6$  in EC/DEC) without RhB.

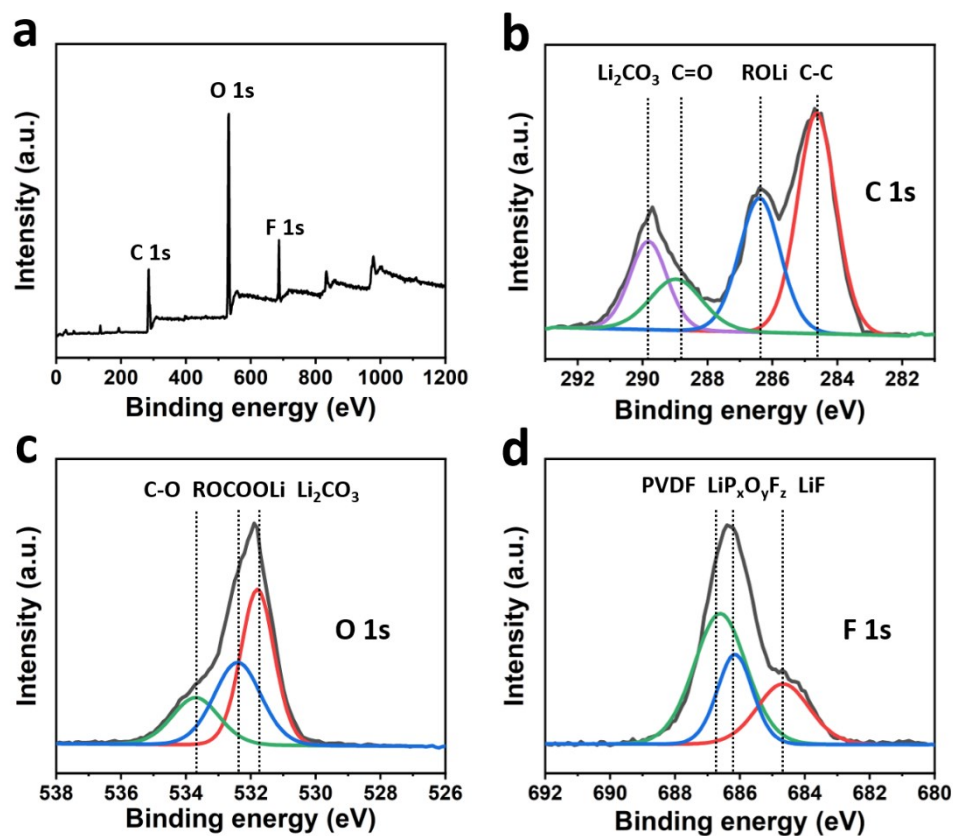

**Figure S4.** XPS spectra of the graphite electrode after 10 cycles in the electrolyte (1 M LiPF<sub>6</sub> in EC/DEC) with RhB.

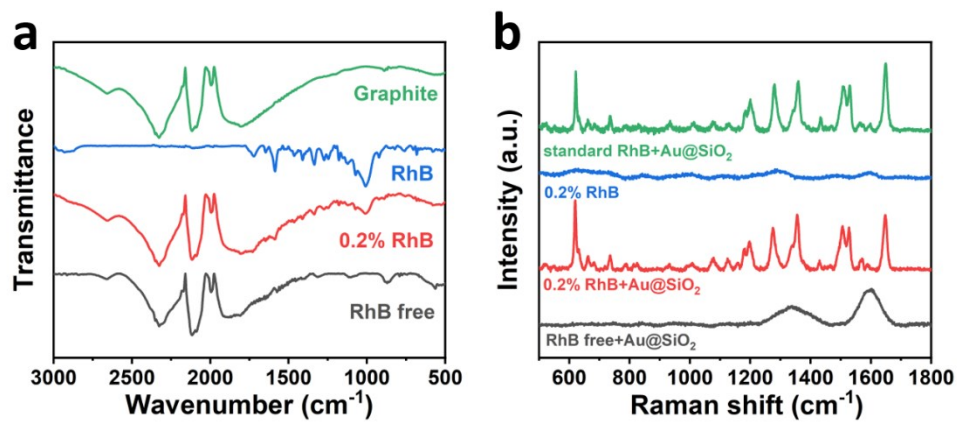

**Figure S5.** *Ex-situ* (a) IR and (b) SERS spectra of the graphite electrode with and without 0.2 wt% RhB after 10 cycles.

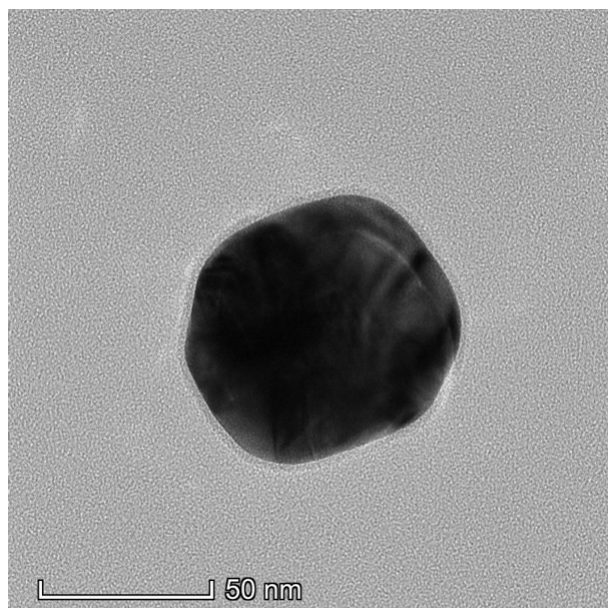

**Figure S6.** TEM image of the SiO<sub>2</sub>-coated Au nanoparticle.

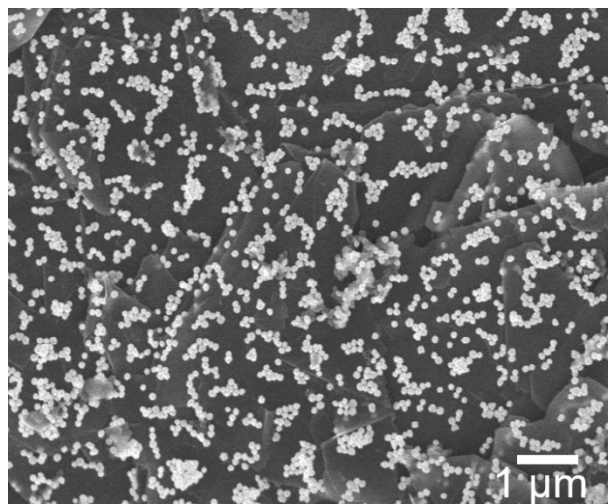

**Figure S7.** SEM image of the graphite electrode with deposited Au@SiO<sub>2</sub> nanoparticles.

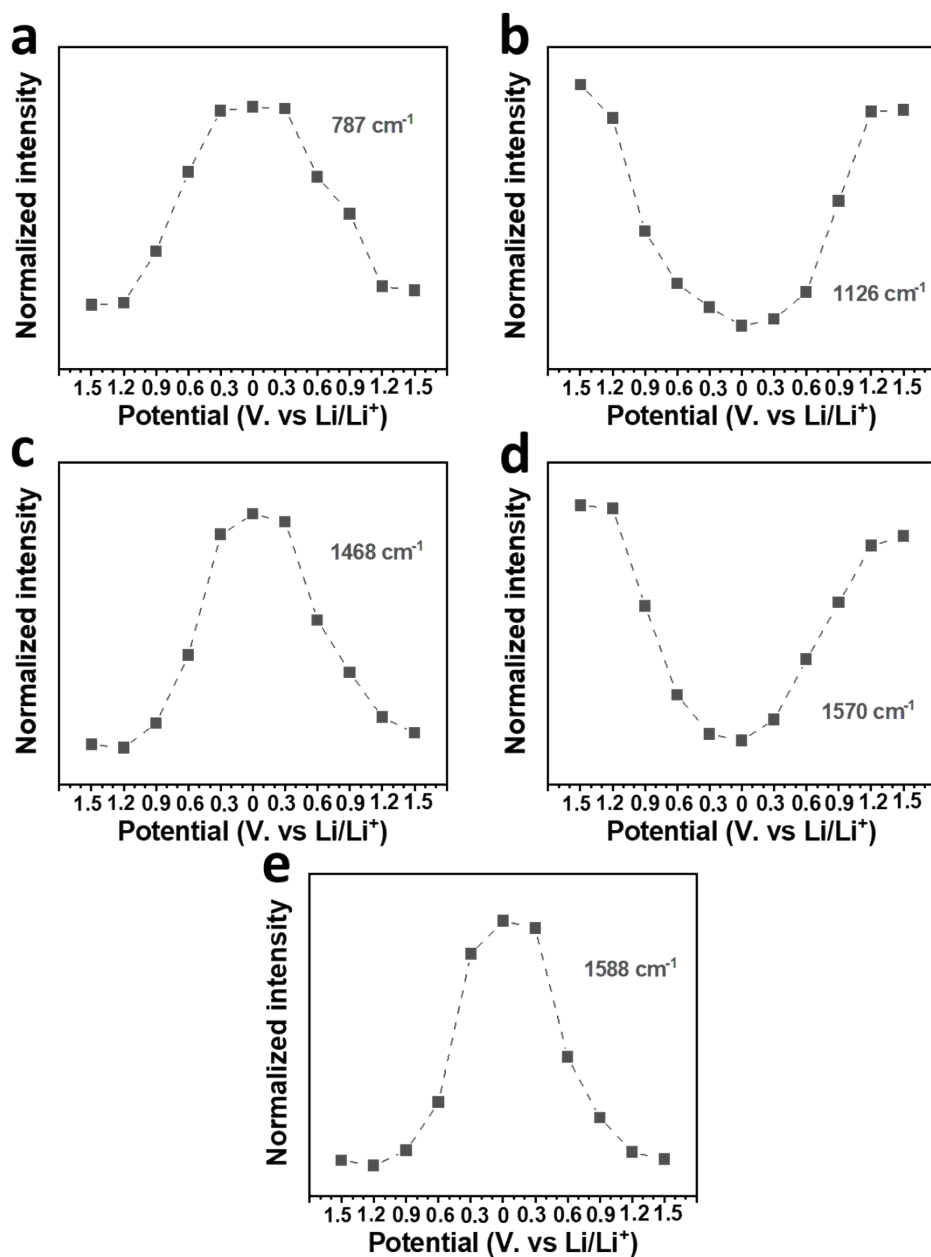

**Figure S8.** Intensity variation of the RhB Raman peaks at (a) 787 cm<sup>-1</sup>, (b) 1126 cm<sup>-1</sup>, (c) 1468 cm<sup>-1</sup>, (d) 1570 cm<sup>-1</sup> and (e) 1588 cm<sup>-1</sup> with the applied potential, respectively.

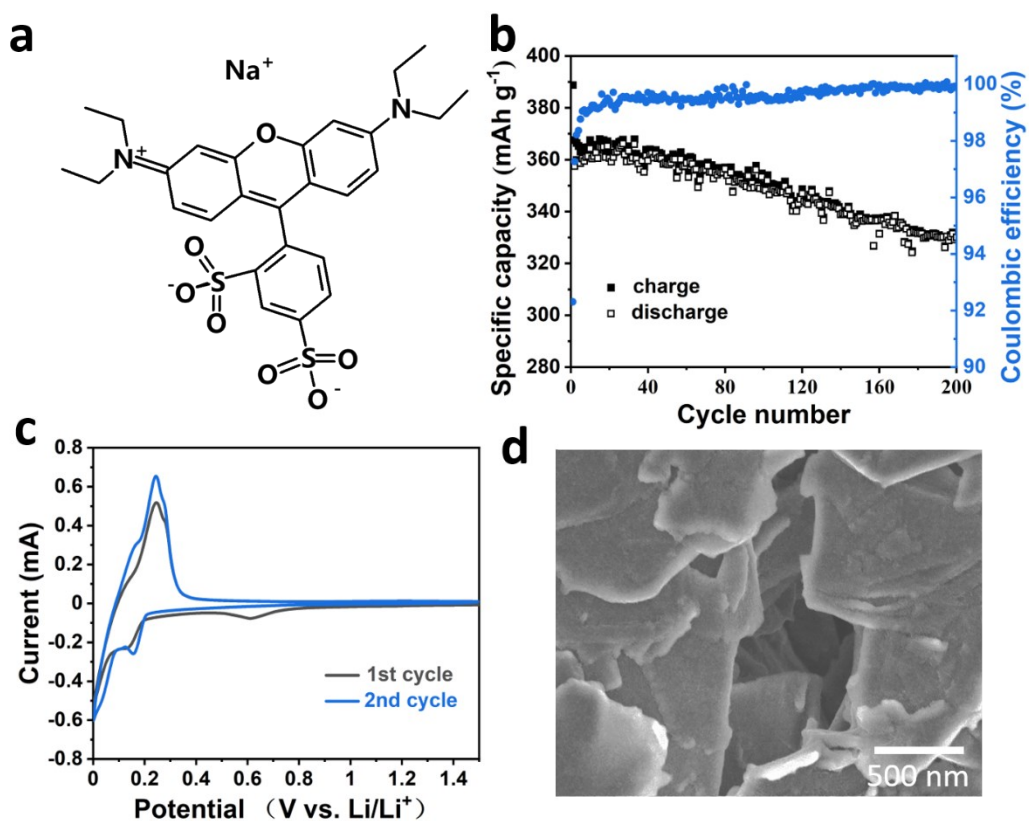

**Figure S9.** (a) The molecular structure of sulforhodamine B (S-RhB). (b) Cycle performance and coulombic efficiency of Li/graphite cells with 0.2 wt% S-RhB at 0.2 C between 1.5 V and 0.005 V. (c) Cyclic voltammetry curves of Li/graphite cells with 0.2 wt% S-RhB at the sweep rate of 0.2 mV s<sup>-1</sup>. (d) SEM image of the graphite electrode with 0.2 wt% S-RhB after 100 cycles.

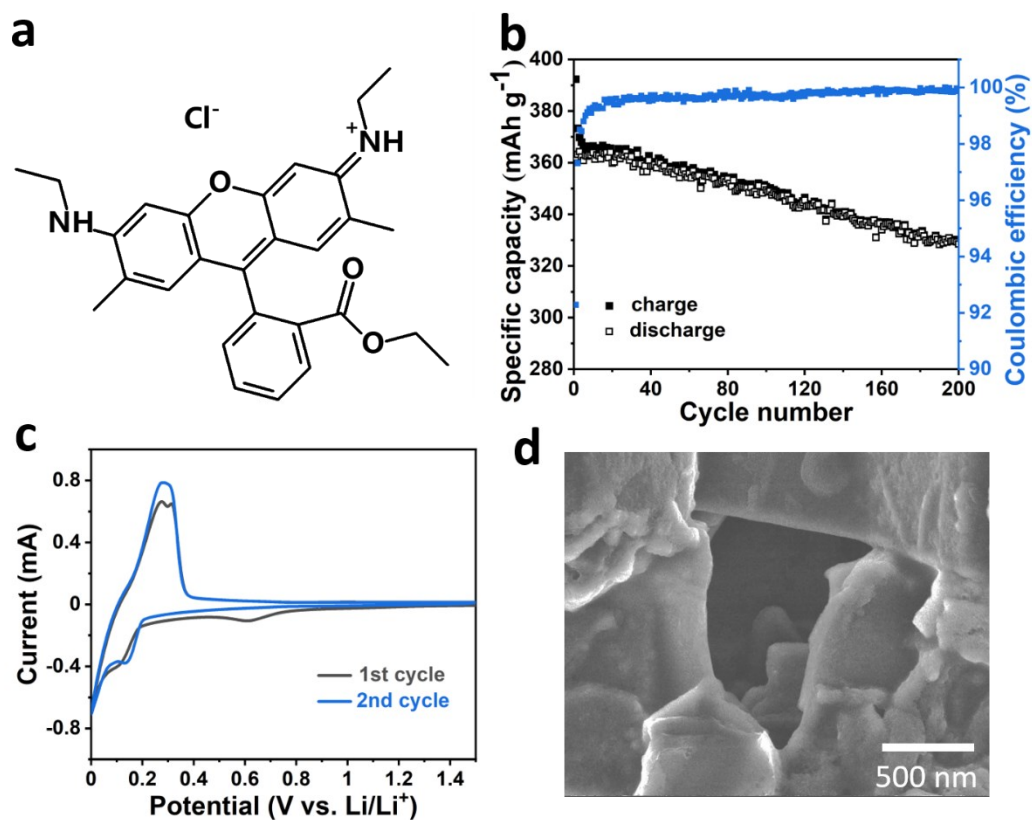

**Figure S10.** (a) The molecular structure of rhodamine 6G (Rh6G). (b) Cycle performance and coulombic efficiency of Li/graphite cells with 0.2 wt% Rh6G at 0.2 C between 1.5 V and 0.005 V. (c) Cyclic voltammetry curves of Li/graphite cells without 0.2 wt% Rh6G at the sweep rate of 0.2 mV s<sup>-1</sup>. (d) SEM image of the graphite electrode with 0.2 wt% Rh6G after 100 cycles.

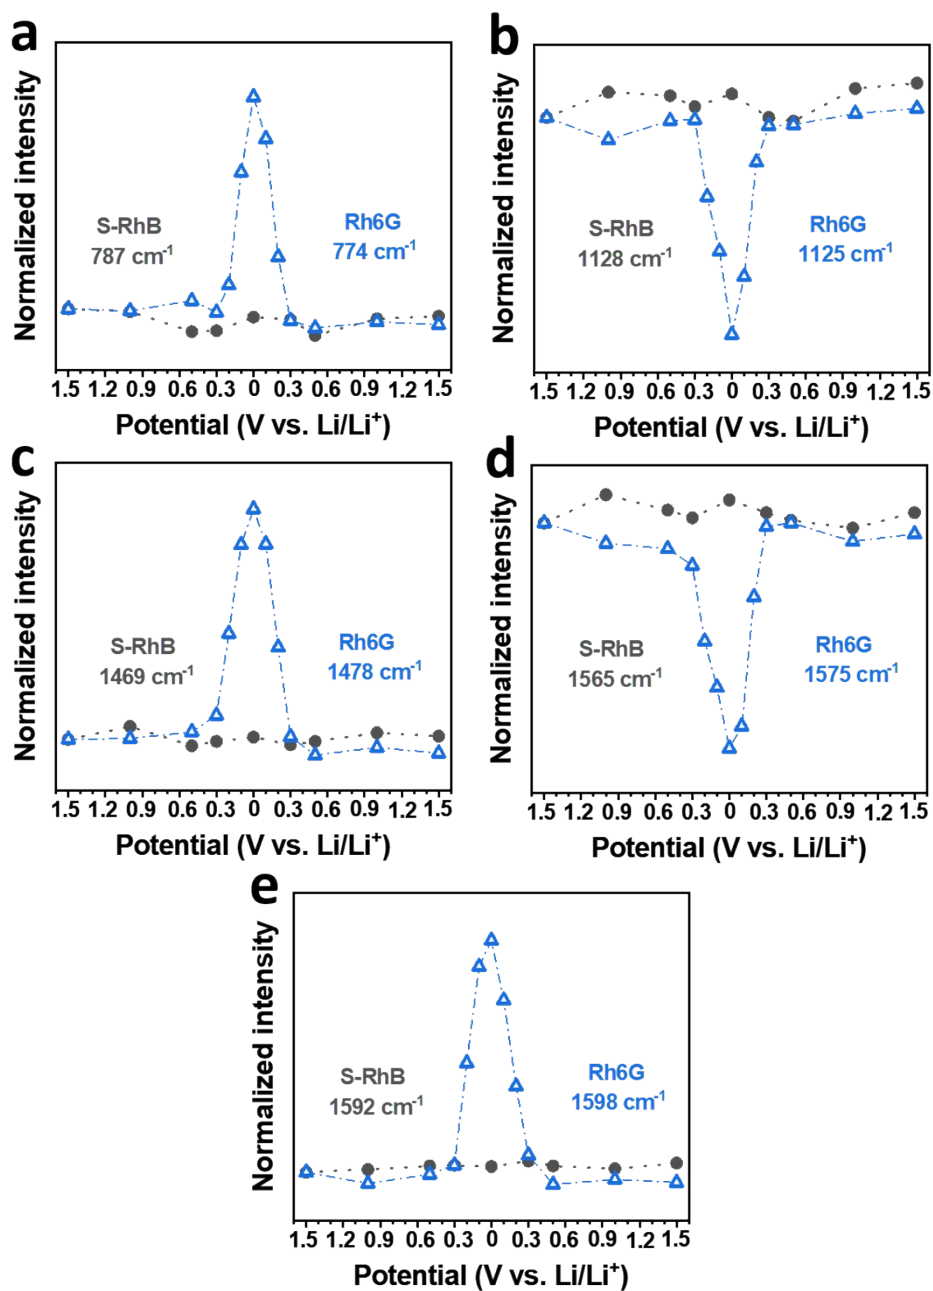

**Figure S11.** Intensity variation of the S-RhB and Rh6G Raman peaks at around (a) 774-787 cm<sup>-1</sup>, (b) 1125-1128 cm<sup>-1</sup>, (c) 1469-1478 cm<sup>-1</sup>, (d) 1565-1575 cm<sup>-1</sup> and (e) 1592-1598 cm<sup>-1</sup> with the applied potential, respectively.

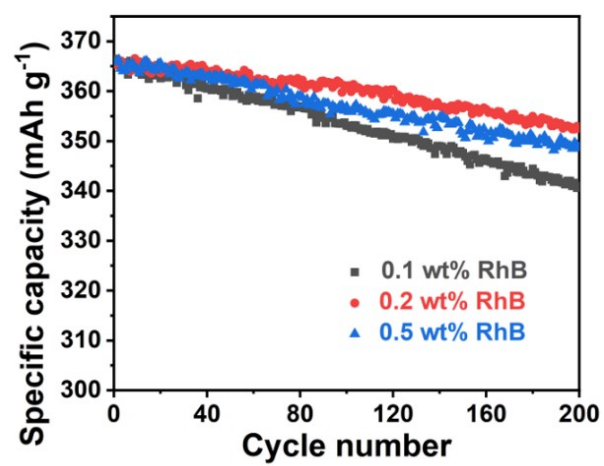

**Figure S12.** Cycle performance of the Li/graphite cells containing the different concentrations of RhB cycled at 0.2 C between 1.5 V and 0.005 V.

**Table S1.** The positions and assignments of partial SERS bands of RhB, S-RhB and Rh6G.

| RhB<br>(cm <sup>-1</sup> ) | S-RhB<br>(cm <sup>-1</sup> ) | Rh6G<br>(cm <sup>-1</sup> ) | Assignment                         |
|----------------------------|------------------------------|-----------------------------|------------------------------------|
| 787                        | 787                          | 774                         | C <sub>x</sub> -H out-of-band bend |
| 1126                       | 1128                         | 1125                        | C <sub>x</sub> -H in-plane bend    |
| 1444                       | 1436                         | 1446                        | C <sub>e</sub> -H bend             |
| 1468                       | 1469                         | 1478                        | C <sub>e</sub> -H bend             |
| 1506                       | 1512                         | 1509                        | Xanthene ring in-plane stretch     |
| 1570                       | 1565                         | 1575                        | Xanthene ring in-plane-stretch     |
| 1588                       | 1592                         | 1598                        | Xanthene ring out-of-plane bend    |

<sup>a</sup> Assignment is based on [1-5].

<sup>b</sup> Subscript x and e denote xanthene ring and ethylamine, respectively.

**Table S2.** The DFT computational adsorption energy of EC, DEC and RhB on graphite (100) and (001) surface.

|            | Ead (eV) |       |
|------------|----------|-------|
|            | 100      | 001   |
| <b>EC</b>  | -0.17    | -0.42 |
| <b>DEC</b> | -1.32    | -0.58 |
| <b>RhB</b> | -3.56    | -5.33 |

#### References:

- [1] C. H. Sun, M. L. Wang, Q. Feng, W. Liu and C. X. Xu, *Russ. J. Phys. Chem. A*, 2015, **89**, 291.
- [2] W. Q. Ma and Y. Fang, *J. Optoelectron. Laser*, 2005, **16**, 1253.
- [3] G. S. S. Saini, S. Kaur, S. K. Tripathi, C. G. Mahajan, H. H. Thanga and A. L. Verma, *Spectrochim. Acta A*, 2005, **61**, 653.
- [4] M. Majoube and M. Henry, *Spectrochim. Acta A*, 1991, **47**, 1459.
- [5] C. J. Chen, C. Zong, G. K. Liu and B. Ren, *J. Electrochem.*, 2016, **22**, 32.
